# Supplementary material
Source: Elsevier journal article supplement (https://www.sciencedirect.com/science/article/pii/S0001731018304009)
Supplement: mmc1 [file S0001731018304009:mmc1.docx]

**Tabla suplementaria 1. Ítems y opciones de respuesta en el cuestionario**

| ***Pregunta/variable*** | ***Posibles respuestas*** |
| --- | --- |
| **Datos demográficos y de vinculación profesional** | |
| **Sexo** | Hombre / mujer |
| **Edad** | Menos de 40 años, 41-50 años, 51-60 años, Más de 60 años |
| **Sección territorial a la que pertenece** | Andaluza, Astur-Cántabra-Castellano-Leonesa, Balear, Canaria, Catalana, Centro, Gallega, Murciana, Valenciana, Vasco-Navarro-Aragonesa-Riojana |
| **¿Cómo describiría su actividad asistencial habitual?** | Solo privada; privada principalmente, pública en menor medida; pública primariamente, privada en menor medida |
| **¿En qué tipo de consulta privada trabaja? (Marque la opción más representativa de su actividad.)** | Consulta propia/de un dermatólogo de hasta 4 médicos en el equipo; consulta propia/de un dermatólogo >4 médicos; centro médico/policlínica de varias especialidades; hospital/clínica privada de gran tamaño |
| **Tarifas** | |
| **¿Las tarifas de su consulta son múltiplo de 10?** | Sí / no |
| **¿Cuál es su minuta por una primera consulta estándar?** | Menos de 50€, 50-69€, 70-89€, 90-120€, más de 120€, prefiero no contestar |
| **¿Cuánto cobra por una revisión?** | Menos de 30€, 30-49€, 50-69€, 70-89€, 90-120€, Más de 120€, prefiero no contestar |
| **¿Cuánto cobra habitualmente por una extirpación de un pequeño nevo de Miescher en la cara (por afeitado, con sutura, con láser, etc) incluido el precio de la consulta y sin contar los gastos de estudio histopatológico?** | Menos de 60€, 61-99€, 100-199€, 200-299€, 300-399€, 400-499€, ≥500€, no realizo cirugía, prefiero no contestar |
| **Y ¿cuánto recibe por la extirpación de un tumor en tronco o de tamaño pequeño-mediano en la cara (con cierre directo) incluido el precio de la consulta y sin contar anatomía patológica, gastos de clínica, anestesista...?** | Menos de 60€, menos de 100€, 100-199€, 200-299€, 300-399€, 400-599€, 600-799€, ≥ 800€, no realizo este tipo de cirugías, prefiero no contestar |
| **Y ¿por la extirpación de un tumor en tronco grande o de mayor tamaño en la cara (con cierre complejo) incluido el precio de la consulta y sin contar anatomía patológica, gastos de clínica, anestesista...?** | Menos de 60€, menos de 100€, 100-199€, 200-299€, 300-399€, 400-599€, 600-799€, 800-999€, 1000-1499€, 1500-1999€, ≥2000€, no realizo este tipo de cirugías, prefiero no contestar |
| **¿Cuánto cobra habitualmente por un tratamiento parcial de una zona de tercio superior facial (por ejemplo, entrecejo solo) con toxina botulínica? (IVA incluido)** | ≤100€, 101-200€, 201-300€, 301-400€, más de 500€, no hago esta técnica, prefiero no contestar |
| **Y ¿cuánto cobra de media por la aplicación de un vial de relleno de ácido hialurónico (por ejemplo, uno de alta reticulación para infiltración malar supraperióstica)? (IVA incluido)** | Menos de 199€, 200-299€, 300-399€, 400-499€, 500-599€, más de 600€, no hago esta técnica, prefiero no contestar |
| **¿Cobra las revisiones de resultados de análisis, estudio histopatológico...?** | Sí / No |
| **¿Cobra las curas postquirúrgicas?** | Nunca, excepcionalmente, frecuentemente, siempre |
| **Si trabaja algunas mañanas, por las tardes o los sábados, (en horario distinto de su habitual), ¿cobra la misma minuta?** | Sí; no, cobro más en ese horario especial; prefiero no contestar / no procede |
| **¿Realiza/ha realizado visitas domiciliarias?** | Sí, y las cobro igual que una en la clínica; sí, y las cobro a un precio mayor; no procede, no hago visitas domiciliarias |
| **¿Realiza teleconsultas / atención por teledermatología?** | Sí, y las cobro igual que las presenciales; sí, y las cobro a un precio inferior a la visita en la clínica; sí, y las cobro a un precio inferior a la visita en la clínica; no procede, no hago teleconsulta |
| **Hábitos de cobros** | |
| **¿Quién cobra a los pacientes en la consulta? (puede seleccionar más de una opción)** | El/la propio/a médico especialista que ha realizado la asistencia; el personal clínico, auxiliar, de enfermería contratado por mí; secretaría, recepcionistas; el personal de la clínica o centro médico |
| **¿Cobra en algún caso (o en alguna técnica concreta) antes de realizar el trabajo?** | No, nunca; pocas veces, cuando tengo gasto de material o necesidad de preparación previos; frecuentemente, en láser y todas las técnicas estéticas |
| **¿Qué porcentaje estimado de sus ingresos de pacientes privados puros cobra en efectivo?** | <25%, 25-49%, 50-74%, ≥75%, no acepto efectivo |
| **¿Acepta pagos con tarjeta?** | Sí / No |
| **Y con tarjeta, ¿qué proporción cobra?** | <25%, 25-49%, 50-74%, ≥75%, no acepto tarjetas |
| **¿Acepta pagos por banca electrónica (transferencia desde el móvil, ordenador)?** | Sí / No |
| **¿Qué porcentaje estimado cobra por banca electrónica?** | Menos de 10%, 10-19%, 20-29%, ≥30%, no uso esta modalidad de pago |
| **¿Acepta pagos con moneda virtual/blockchain (Bitcoin, Ethereum...)?** | Sí; no; no, pero me lo planteo en un futuro próximo |
| **¿Cobra (aunque sea ocasionalmente) en forma de trueque/intercambio de servicios?** | Nunca, rara vez, habitualmente |
| **Promociones y actualización de precios** | |
| **¿Ofrece bonos de tratamiento (packs de sesiones) para tratamientos estéticos?** | Sí; sí, pero solo en unos pocos tratamientos / técnicas; no, nunca; prefiero no contestar / no procede |
| **¿Ofrece financiación de los tratamientos?** | No, y no me lo planteo; no, pero estoy considerando hacerlo; sí, excepcionalmente; sí, habitualmente; prefiero no contestar / no procede |
| **¿Realiza algún descuento por consulta de varios miembros de la familia en la misma visita?** | Nunca, excepcionalmente, siempre, prefiero no contestar / no procede |
| **¿Cada cuánto tiempo suele ajustar/revisar los precios?** | Cada año, siguiendo el IPC; cada 2 años; cada 3-5 años; en períodos de más de 5 años; únicamente cuando lo considero oportuno |
