# Supplementary material
Source: Elsevier journal article supplement (https://www.sciencedirect.com/science/article/pii/S0001731018304009)
Supplement: mmc2 [file S0001731018304009:mmc2.docx]

**Tabla suplementaria 2. Recodificación de las categorías de tarifas en valores absolutos**

| **Variables de tarifa** | **Categorías de las variables originales** | **Valores tras recodificación (medias estimadas) *** | |
| --- | --- | --- | --- |
| **1ª visita** | Menos de 50€, 50-69€, 70-89€, 90-120€, más de 120€, prefiero no contestar | 45€, 60€, 80€, 105€, 150€, vp |
| **Visita de revisión** | Menos de 30€, 30-49€, 50-69€, 70-89€, 90-120€, Más de 120€, prefiero no contestar | 25€, 40€, 60€, 80€, 105€, 150€, vp |
| **Cirugía de complejidad menor** | Menos de 60€, 61-99€, 100-199€, 200-299€, 300-399€, 400-499€, ≥500€, no realizo cirugía, prefiero no contestar | 50€, 75€, 150€, 250€, 350€, 450€, 600€, vp, vp |
| **Cirugía de complejidad media** | Menos de 60€, menos de 100€, 100-199€, 200-299€, 300-399€, 400-599€, 600-799€, ≥ 800€, no realizo este tipo de cirugías, prefiero no contestar | 50€, 75€, 150€, 250€, 350€, 500€, 700€, 1000€, vp, vp |
| **Cirugía de complejidad alta** | Menos de 60€, menos de 100€, 100-199€, 200-299€, 300-399€, 400-599€, 600-799€, 800-999€, 1000-1499€, 1500-1999€, ≥2000€, no realizo este tipo de cirugías, prefiero no contestar | 50€, 75€, 150€, 250€, 350€, 500€, 700€, 900€, 1250€, 1750€, 2500€, vp, vp |
| **Toxina botulínica estética (1 área limitada)** | ≤100€, 101-200€, 201-300€, 301-400€, más de 500€, no hago esta técnica, prefiero no contestar | 80€, 150€, 250€, 400€, 500€, 650€, vp, vp | |
| **Ácido hialurónico (1 área limitada)** | Menos de 199€, 200-299€, 300-399€, 400-499€, 500-599€, más de 600€, no hago esta técnica, prefiero no contestar | 150€, 250€, 350€, 450€, 550€, 600€, vp, vp | |

* vp: Valor perdido
